# Supplementary material
Source: PubMed Central journal article supplement (PMC5896562)
Supplement: NIHMS882515-supplement-Supp_Table_1.pdf [file NIHMS882515-supplement-Supp_Table_1.pdf]

|                                   | <b>GBM<sub>cw1919</sub></b> | <b>GBM<sub>528</sub></b> | <b>GBM<sub>3565</sub></b> |
|-----------------------------------|-----------------------------|--------------------------|---------------------------|
| <b>Grade</b>                      | WHO - IV                    | WHO - IV                 | WHO - IV                  |
| Molecular Subtype (Verhaak, 2010) | Proneural                   | Proneural                | Mesenchymal               |
| <b>IDH1/2 status</b>              | WT                          | WT                       | WT                        |
| <b>G-CIMP Status</b>              | Non G-CIMP                  | N/A                      | Non G-CIMP                |
| <b>Mutation Status</b>            |                             |                          |                           |
| RB1                               | Homozygous Null             | Homozygous Mutation      | Homozygous Null           |
| TP53                              | Homozygous Null             | Heterozygous Null        | WT                        |
| EGFR                              | WT                          | WT                       | Homozygous Null           |
| GABRA6                            | WT                          | WT                       | Heterozygous Null         |
| CIC                               | WT                          | WT                       | Heterozygous Mutation     |
| PIK3R1                            | WT                          | WT                       | WT                        |
| PIK3CA                            | WT                          | WT                       | WT                        |
| PTEN                              | WT                          | WT                       | WT                        |
| IDH1                              | WT                          | WT                       | WT                        |
| BRAF                              | WT                          | WT                       | WT                        |
| NF1                               | WT                          | WT                       | WT                        |
| SPTA1                             | WT                          | WT                       | WT                        |
| KEL                               | WT                          | WT                       | WT                        |
| CDH18                             | WT                          | WT                       | WT                        |
| SEMA3C                            | WT                          | WT                       | WT                        |
| PDGFRA                            | WT                          | WT                       | WT                        |
| ATRX                              | WT                          | WT                       | WT                        |
| COL1A2                            | WT                          | WT                       | WT                        |
| LZTR1                             | WT                          | WT                       | WT                        |
| ABCC9                             | WT                          | WT                       | WT                        |
| NLRP5                             | WT                          | WT                       | WT                        |
| DRD5                              | WT                          | WT                       | WT                        |
| TCHH                              | WT                          | WT                       | WT                        |
| FUBP1                             | WT                          | WT                       | WT                        |
| SCN9A                             | WT                          | WT                       | WT                        |
| IDH2                              | WT                          | WT                       | WT                        |
| JMJD6                             | WT                          | WT                       | WT                        |
| <b>Copy Number Variants</b>       |                             |                          |                           |
| EGFR                              | Amplified                   | WT                       | WT                        |
| MYC                               | WT                          | Amplified                | Amplified                 |
| MDM4                              | WT                          | WT                       | Amplified                 |
| PDGFRA                            | WT                          | WT                       | WT                        |
| TP53                              | Heterozygous Loss           | N/A                      | WT                        |
| PTEN                              | Heterozygous Loss           | N/A                      | Heterozygous Loss         |
| MGMT                              | WT                          | N/A                      | Heterozygous Loss         |
| CCND1                             | WT                          | N/A                      | Heterozygous Loss         |
| CCND2                             | Heterozygous Loss           | N/A                      | WT                        |

|        |                   |     |                   |
|--------|-------------------|-----|-------------------|
| RB1    | WT                | N/A | Heterozygous Loss |
| C19MC  | Heterozygous Loss | N/A | Homozygous Loss   |
| CDKN2A | WT                | N/A | WT                |
| CDK4   | WT                | N/A | WT                |

| Legend           |  |
|------------------|--|
| Missense         |  |
| Nonsense         |  |
| In-frame indel   |  |
| Frameshift indel |  |
| Splice variant   |  |

#### Individual Gene Mutation Information

##### GBM528

Gene: RB1, Zygosity: homozygous, Consequence: SPLICE\_REGION\_VARIANT, CADD: 10.68, VVP: 95.0, Omicia: 0.42

Gene: TP53, Zygosity: heterozygous, Consequence: MISSENSE\_VARIANT, CADD: 23.6, VVP: 95.0, Omicia: 0.947

Gene: TP53, Zygosity: heterozygous, Consequence: MISSENSE\_VARIANT, CADD: 22.1, VVP: 80.0, Omicia: 0.848

##### GBM3565

Gene: EGFR, Zygosity: homozygous, Consequence: MISSENSE\_VARIANT, CADD: 17.86, VVP: 54.0, Omicia: 0.768

Gene: RB1, Zygosity: homozygous, Consequence: FRAMESHIFT\_VARIANT, CADD: 0, VVP: 96.0, Omicia: 0.8

Gene: RB1, Zygosity: homozygous, Consequence: MISSENSE\_VARIANT, CADD: 18.44, VVP: 86.0, Omicia: 0.778

Gene: GABRA6, Zygosity: heterozygous, Consequence: MISSENSE\_VARIANT, CADD: 6.422, VVP: 76.0, Omicia: 0.365

Gene: EGFR, Zygosity: heterozygous, Consequence: MISSENSE\_VARIANT, CADD: 14.82, VVP: 25.0, Omicia: 0.599

Gene: CIC, Zygosity: heterozygous, Consequence: SPLICE\_REGION\_VARIANT, CADD: 7.752, VVP: 48.0, Omicia: 0.434

##### GBMcw1919

Gene: RB1, Zygosity: homozygous, Consequence: STOP\_GAINED, CADD: 38.0, VVP: 100.0, Omicia: 0.645

Gene: TP53, Zygosity: homozygous, Consequence: INFRAME\_DELETION, CADD: 0, VVP: 90.0, Omicia: 0.5
